# Supplementary material for: Uninfected Bystander Cells Impact the Measurement of HIV-Specific Antibody-Dependent Cellular Cytotoxicity Responses
Source: PubMed Central journal article supplement (PMC5874913; doi:10.1128/mbio.00358-18), 2018-03-20
Supplement: mbo002183786s1.pdf [file mbo002183786s1.pdf]

1 **SUPPLEMENTAL METHODS**

2

3 **Primary cells**

4 PBMC were obtained by leukapheresis. NK cells and CD4<sup>+</sup> T lymphocytes were purified  
5 from resting PBMCs by negative selection using immunomagnetic beads per the  
6 manufacturer's instructions (StemCell Technologies, Vancouver, BC). NK cells were  
7 cultured overnight in RPMI 1640 complete medium supplemented with 20% fetal bovine  
8 serum and 100 µg/mL penicillin-streptomycin before use. CD4<sup>+</sup> T lymphocytes were  
9 activated with phytohemagglutinin-L (10 µg/ mL) for 48 hours and then maintained in  
10 RPMI 1640 complete medium supplemented with rIL-2 (100 U/mL).

11

12 **Antibodies**

13 The following Abs were used as first Ab for cell surface staining: 1 µg/mL mouse anti-  
14 CD4 mAb OKT4 (14-0048-82; eBiosciences), 5 µg/mL human anti-HIV-1 Env mAbs  
15 A32, PGT126 (kindly provided by the International AIDS Vaccine Initiative), 3BNC117  
16 (kindly provided by M.C. Nussenzweig, The Rockefeller University, New York, NY), 1  
17 µg/mL of either Alexa Fluor 647-conjugated goat anti-mouse or goat anti-human Abs  
18 (Thermo Fisher Scientific) were used as secondary Abs. The following Abs were used  
19 for the NK cell activation assay: APC-conjugated anti-CD107a (BD Biosciences, H4A3),  
20 BV421-conjugated anti-CD3 (Biolegend, UCHT1), PE-conjugated anti-CD56 (BD  
21 Biosciences, NCAM16.2) and PE-Cy7-conjugated anti-IFN $\gamma$  (BD Biosciences, B27). The  
22 following Abs were used for RNA-flow analysis: BUV395-conjugated anti-CD3 (BD  
23 Biosciences, UCHT1), PE-Cy7-conjugated anti-CD4 (BD Biosciences, RPA-T4) BV510-

24 conjugated anti-CD8 (Biolegend, SK1), BV510-conjugated anti-CD14 (Biolegend,  
25 M5E2) BV510-conjugated anti-CD19 (Biolegend, H1B19) and PE-conjugated anti-p24  
26 (Beckman Coulter/Immunotech, KC57), while AquaVivid (Thermo Fisher Scientific)  
27 was used as viability dye.

28

## 29 **ADCC measurements**

### 30 **FACS-based assay**

31 Measurement of ADCC using the FACS-based assay was performed at 48h post-  
32 infection as previously described (1-3). Briefly, infected primary CD4<sup>+</sup> T cells were  
33 stained with viability (AquaVivid; Thermo Fisher Scientific) and cellular (cell  
34 proliferation dye eFluor670; eBioscience) markers and used as target cells. Autologous  
35 PBMC effectors cells, stained with another cellular marker (cell proliferation dye  
36 eFluor450; eBioscience), were added at an effector: target ratio of 10:1 in 96-well V-  
37 bottom plates (Corning, Corning, NY). A 1:1,000 final dilution of sera or 5 µg/ml of  
38 ADCC-mediating mAbs were added to appropriate wells and cells were incubated for 15  
39 min at room temperature. The plates were subsequently centrifuged for 1 min at 300 g,  
40 and incubated at 37°C, 5% CO<sub>2</sub> for 5 to 6 h before being fixed in a 2% PBS-  
41 formaldehyde solution containing 5x10<sup>4</sup> flow cytometry particles/ml (AccuCount blank  
42 particles; 5.3 µm; Spherotech). Samples were analyzed on an LSRII cytometer (BD  
43 Biosciences) and acquisition was set to acquire 1,000 flow cytometry particles, which  
44 allows the calculation of relative cell counts (2). Data analysis was performed using  
45 FlowJo vX.0.7 (Tree Star). The percentage of ADCC was calculated with the following  
46 formula: (relative count of GFP<sup>+</sup> cells in targets plus effectors) - (relative count of GFP<sup>+</sup>

47 cells in targets plus effectors plus Abs or sera) / (relative count of GFP+ cells in targets)  
48 by gating infected live target cells. For cells infected with HIV-1 primary isolates,  
49 infected cells were identified by intracellular staining for HIV-1 p24. In that context, the  
50 percentage of ADCC was calculated with the following formula: (% of p24+ cells in  
51 Targets plus Effectors) – (% of p24+ cells in Targets plus Effectors plus sera) / (% of  
52 p24+ cells in Targets) by gating on infected lived target cells.

53

#### 54 **Granzyme B assay**

55 Measurement of ADCC response using the Granzyme B assay was performed 48h  
56 post-infection according to the manufacturer's instructions (OncoImmunin, Gaithersburg,  
57 MD) and as previously described (4, 5). Briefly, infected primary CD4+ T cells were  
58 stained with a fluorescent target cell marker (TFL4; OncoImmunin, Gaithersburg, MD)  
59 and a viability marker (NFL1; OncoImmunin or AquaVivid; Thermo Fisher Scientific).  
60 Rested autologous purified NK cells were used as effector cells. Target and effector cells  
61 were counted and adjusted to reach a final effector: target ratio of 10:1. Twenty-five µl of  
62 each effector and target cell suspension and 75 µl of Granzyme B substrate  
63 (OncoImmunin) was dispensed into each well of a 96-well V-bottom plate (Corning). A  
64 1:1,000 final dilution of sera or 5 µg/ml or ADCC-mediating Abs were added to  
65 appropriate wells and cells were incubated for 15 min at room temperature. The plates  
66 were subsequently centrifuged for 1 min at 300 g, and incubated for 1 h at 37°C and 5%  
67 CO<sub>2</sub>. After two washes, cells were acquired on an LSRII cytometer (BD Biosciences)  
68 and data analysis was performed using FlowJo vX.0.7 (Tree Star). The percentage of Ab  
69 or sera-induced Granzyme B activity was calculated with the following formula:

70 (Percentage of Granzyme B+ target cells in targets plus effectors plus Abs or sera) -  
71 (Percentage of Granzyme B+ target cells in targets plus effectors) per the gating strategy  
72 presented in Fig S5.

73

#### 74 **NK cell activation assay**

75 Measurement of ADCC response using the NK cell activation assay was  
76 performed using a modified version of a previously described protocol (6). Briefly,  
77 primary CD4+ T cells infected for 48h were co-cultured with autologous PBMC at an  
78 effector: target ratio of 5:1 in the presence of a 1:1,000 final dilution of sera or 5 µg/ml or  
79 ADCC-mediating Abs, anti-CD107a, Brefeldin A (Sigma) (5µg/ml) and Monensin (BD  
80 Biosciences) (6µg/ml) for 5h at 37°C. Control conditions included incubation of PBMC  
81 alone or incubation of PBMC with mock cells in the presence of sera or ADCC-  
82 mediating Abs. After incubation cells were surface stained with anti-CD3 and anti-CD56  
83 Abs. Next, cells were fixed and permeabilized using the Cytotfix/Cytoperm Fixation/  
84 Permeabilization Kit (BD Biosciences) and stained with anti-IFN $\gamma$  Ab. Samples were  
85 analyzed on an LSRII cytometer (BD Biosciences) and data analysis was performed  
86 using FlowJo vX.0.7 (Tree Star). The percentage of Ab or sera-induced NK cell  
87 activation was calculated with the following formula: (Percentage of NK cells (CD3-  
88 CD56+) positive for CD107a and/or IFN $\gamma$  in targets plus effectors plus Abs or sera) -  
89 (Percentage of NK cells (CD3-CD56+) positive for CD107a and/or IFN $\gamma$  in targets plus  
90 effectors) according to the gating strategy presented in Fig S5.

91

#### 92 **Luciferase assay**

93 Measurement of ADCC responses using the Luciferase assay was performed as  
94 previously described (7). Briefly, CEM.NKR-CCR5-sLTR-Luc target cells, which  
95 express luciferase (Luc) under the control of a Tat-inducible promoter, were infected and  
96 used as target cells at 48h post-infection. Primary human PBMCs or NK cell line  
97 expressing human CD16 were used as effector cells. Target and effector cells were co-  
98 cultured for 6-8h, in triplicate, at an effector: target ratio of 10:1 in the presence of  
99 different concentrations of Abs (0.0024, 0.0098, 0.0390, 0.1563, 0.6250, 2.5, 10 or 40  
100 µg/ml) or different dilution of human sera (1:100, 1:400, 1:1600, 1:6400, 1:25600,  
101 1:102400, 1:409600 or 1:1638400). The dose-dependent loss of Luc activity was  
102 measured as an indication of sera or Ab-mediated killing of productively-infected cells.  
103 Infected target cells incubated with effector cells in the absence of sera or Ab were used  
104 to measure maximal Luc activity, and uninfected target cells cultured with effector cells  
105 were used to determine background Luc activity. Area under the curve (AUC) values for  
106 ADCC were calculated as previously described (7). For experiments involving CH77 wt  
107 and N-U- viruses, the *vif* gene was deleted by site-directed mutagenesis. The nucleotides  
108 62 and 63 in *vif* were deleted, causing a frame-shift that resulted in an early stop codon  
109 (W21\*) while preserving the *pol* open reading frame.

110

#### 111 **RFADCC assay**

112 CEM.NKR-CCR5-sLTR-Luc target cells were coated or not with 1 µg/ml of  
113 recombinant gp120 protein derived from the HIV-1 YU2 strain for 30 minutes at 37°C  
114 +5% CO<sub>2</sub>. Cells were then double stained with PKH26 red fluorescent cell linker  
115 (Sigma-Aldrich, USA) and the cellular proliferation marker eFluor670 (eBioscience) as

116 previously described (2, 8, 9) Cells were then dispensed together with different  
117 concentration of Abs (0.008, 0.04, 0.2, 1 and 5  $\mu\text{g/ml}$ ) or different dilutions of sera  
118 (1:100, 1:400, 1:1600, 1:6400 and 1:25600). After 15 min at room temperature, effector  
119 cells (Rested primary PBMCs) were added at an effector: target ratio of 50:1. Plates were  
120 centrifuged for 1 min at 300 g and incubated for 4 h at 37°C. Cells were washed, fixed  
121 and acquired on an LSRII cytometer (BD Biosciences). Data analysis was performed  
122 using FlowJo vX.0.7 (Tree Star). The percentage of cytotoxicity was calculated with the  
123 following formula: (Percentage of cells that remained PKH26+ but that had lost the  
124 proliferation dye (eFluor670-) in target cells coated with recombinant gp120 plus  
125 effectors plus Abs or sera) - (Percentage of cells that remained PKH26+ but that had lost  
126 the proliferation dye (eFluor670-) in target cells plus effectors plus Abs or sera)  
127 according to the gating strategy presented in Fig S6.

128

129

130 **References**

- 131 1. Veillette M, Desormeaux A, Medjahed H, Gharsallah NE, Coutu M, Baalwa J,  
132 Guan Y, Lewis G, Ferrari G, Hahn BH, Haynes BF, Robinson JE, Kaufmann DE,  
133 Bonsignori M, Sodroski J, Finzi A. 2014. Interaction with cellular CD4 exposes  
134 HIV-1 envelope epitopes targeted by antibody-dependent cell-mediated  
135 cytotoxicity. *J Virol* 88:2633-44.
- 136 2. Richard J, Veillette M, Batrville LA, Coutu M, Chapleau JP, Bonsignori M,  
137 Bernard N, Tremblay C, Roger M, Kaufmann DE, Finzi A. 2014. Flow  
138 cytometry-based assay to study HIV-1 gp120 specific antibody-dependent cellular  
139 cytotoxicity responses. *J Virol Methods* 208:107-14.
- 140 3. Richard J, Veillette M, Brassard N, Iyer SS, Roger M, Martin L, Pazgier M,  
141 Schon A, Freire E, Routy JP, Smith AB, 3rd, Park J, Jones DM, Courter JR,  
142 Melillo BN, Kaufmann DE, Hahn BH, Permar SR, Haynes BF, Madani N,  
143 Sodroski JG, Finzi A. 2015. CD4 mimetics sensitize HIV-1-infected cells to  
144 ADCC. *Proc Natl Acad Sci U S A* 112:E2687-94.
- 145 4. Pollara J, Hart L, Brewer F, Pickeral J, Packard BZ, Hoxie JA, Komoriya A,  
146 Ochsenbauer C, Kappes JC, Roederer M, Huang Y, Weinhold KJ, Tomaras GD,  
147 Haynes BF, Montefiori DC, Ferrari G. 2011. High-throughput quantitative  
148 analysis of HIV-1 and SIV-specific ADCC-mediating antibody responses.  
149 *Cytometry A* 79:603-12.
- 150 5. Konstantinus IN, Gamielien H, Mkhize NN, Kriek JM, Passmore JA. 2016.  
151 Comparing high-throughput methods to measure NK cell-mediated antibody

- 152 dependent cellular cytotoxicity during HIV-infection. *J Immunol Methods*  
153 434:46-52.
- 154 6. Gooneratne SL, Richard J, Lee WS, Finzi A, Kent SJ, Parsons MS. 2015. Slaying  
155 the Trojan horse: natural killer cells exhibit robust anti-HIV-1 antibody-dependent  
156 activation and cytolysis against allogeneic T cells. *J Virol* 89:97-109.
- 157 7. Alpert MD, Heyer LN, Williams DE, Harvey JD, Greenough T, Allhorn M, Evans  
158 DT. 2012. A novel assay for antibody-dependent cell-mediated cytotoxicity  
159 against HIV-1- or SIV-infected cells reveals incomplete overlap with antibodies  
160 measured by neutralization and binding assays. *J Virol* 86:12039-52.
- 161 8. Gomez-Roman VR, Florese RH, Patterson LJ, Peng B, Venzon D, Aldrich K,  
162 Robert-Guroff M. 2006. A simplified method for the rapid fluorometric  
163 assessment of antibody-dependent cell-mediated cytotoxicity. *J Immunol Methods*  
164 308:53-67.
- 165 9. Ruiz MJ, Ghiglione Y, Falivene J, Laufer N, Holgado MP, Socias ME, Cahn P,  
166 Sued O, Giavedoni L, Salomon H, Gherardi MM, Rodriguez AM, Turk G. 2016.  
167 Env-Specific IgA from Viremic HIV-Infected Subjects Compromises Antibody-  
168 Dependent Cellular Cytotoxicity. *J Virol* 90:670-81.

169

170

171

172

173



174 **SUPPLEMENTAL FIGURE LEGEND**

175

176 **Fig S1. Level of cell-surface CD4 on infected and uninfected cells.** Cell-surface  
177 staining of primary CD4<sup>+</sup> T cells mock-infected (Mock) or infected with the NL4.3 ADA  
178 GFP virus, either wild-type (HIV WT) or defective for Nef and Vpu expression (HIV N-  
179 U-) with the anti-CD4 OKT4 Ab (1 $\mu$ g/ml) (A) Dot plots depicting representative  
180 staining. (B) Mean Fluorescence Intensity (MFI) obtained for at least 5 different  
181 experiments. Error bars indicate means  $\pm$  standard errors of the means. Statistical  
182 significance was tested using Ordinary one-way ANOVA. (\*\*\*)  $p < 0.001$ , ns: non-  
183 significant).

184

185 **Fig S2. Recognition of primary CD4<sup>+</sup> T cells infected with the transmitted/founder**  
186 **virus CH77.** Primary CD4<sup>+</sup> T cells were mock-infected or infected with the  
187 transmitted/founder virus CH77, either wild-type (HIV WT) or defective for Nef and Vpu  
188 expression (HIV N-U-). Forty-eight hours post-infection, cells were stained with A32,  
189 PGT126, 3BNC117 (5  $\mu$ g/ml) or sera from 10 HIV-1-infected individuals (HIV<sup>+</sup> sera) or  
190 5 uninfected individuals (HIV<sup>-</sup> sera) (1:1000 dilution), followed with appropriate  
191 secondary Abs. Shown in (A) are the mean fluorescence intensities (MFI) obtained for at  
192 least 5 independent stains with the different Abs, with 10 HIV<sup>+</sup> or 5 HIV<sup>-</sup> sera on cells  
193 infected with WT virus. Graphs shown in (B) represent the MFI obtained for 5  
194 independent stains with A32, with 10 HIV<sup>+</sup> sera or 5 HIV<sup>-</sup> sera on cells infected with  
195 WT and N-U- virus. Error bars indicate means  $\pm$  standard errors of the means. Statistical

196 significance was tested using (A) Ordinary one-way ANOVA, (B) unpaired t test or  
197 Mann-Whitney test (\* p<0.05, (\*\* p<0.01, \*\*\*\* p<0.0001, ns: non-significant).

198

199 **Fig S3. ADCC responses detected by the Luciferase assays.** Representation of the  
200 ADCC responses detected by the Luc assay (presented in Fig 2) as the loss of luciferase  
201 signal (RLU). (A) ADCC responses mediated by A32, PGT126 and 3BNC117 (0.0024,  
202 0.0098, 0.0390, 0.1563, 0.6250, 2.5 and 10 µg/ml) against cells infected with NL4.3  
203 ADA GFP WT. (B) ADCC responses mediated by A32 (0.0024, 0.0098, 0.0390, 0.1563,  
204 0.6250, 2.5 and 10 µg/ml), HIV+ or HIV- sera (1:100, 1:400, 1:1600, 1:6400, 1:25600  
205 and 1:102400) against cells infected with NL4.3 ADA GFP WT (HIV WT) or defective  
206 for Nef and Vpu expression (HIV N-U-). Error bars indicate means ± standard errors of  
207 the means.

208

209 **Fig S4. ADCC responses detected with the FACS-based and Luciferase assays**  
210 **against cells infected with the transmitted/founder virus CH77.** (A-C) Primary CD4+  
211 T cells or (D-F) CEM.NKR-CCR5-sLTR-Luc cells infected with the transmitted/founder  
212 virus CH77, either wild-type (HIV WT) (depicted in gray) or defective for Nef and Vpu  
213 expression (HIV N-U-) (depicted in black) were used as target cells with the (A-C)  
214 FACS-based infected cell elimination assay or (D-F) the Luciferase assays. Shown in  
215 (A,D) are ADCC responses mediated by A32, PGT126 and 3BNC117 against cells  
216 infected with WT virus, and in (B,C,E,F) ADCC responses mediated by (B,E) A32 or  
217 (C,F) HIV+ and HIV- sera against cells infected with WT or N-U- virus. (A-C) All  
218 graphs shown represent ADCC responses obtained from at least 5 independent

219 experiments. (D-F) ADCC responses presented as loss of luciferase signal (RLU) in  
220 triplicate. For the FACS-based assay, mAbs were used at 5µg/ml and human sera at a  
221 1:1000 dilution. For the Luciferase assay, mAbs were used at 0.0024, 0.0098, 0.0390,  
222 0.1563, 0.6250, 2.5, 10 and 40 µg/ml and human sera at a dilution of 1:100, 1:400,  
223 1:1600, 1:6400, 1:25600, 1:102400, 1:409600 and 1:1638400. Error bars indicate means  
224 ± standard errors of the means. Statistical significance was tested using unpaired t test  
225 (\*\*\*) p<0.001, \*\*\*\* p<0.0001, ns: non-significant).

226

227 **Fig S5. Gating strategy used for the NK cell activation and Granzyme B assays.**

228 Gating strategy and dot plots depicting a representative detection of (A) NK cell  
229 activation and (B) granzyme B activity in the context of cells infected with NL4.3 ADA  
230 GFP virus, either WT (HIV WT) or defective for Nef and Vpu expression (HIV N-U-) in  
231 the presence or absence of A32.

232

233 **Fig S6. Gating strategy used for the RFADCC assays.** Gating strategy and dot plots

234 depicting representative detection of responses mediated by A32 against target cells  
235 coated or not with recombinant gp120 using the RFADCC assay.

236

237 **Fig S7. The vast majority of uninfected bystander CD4+ T cells remain uninfected**

238 **after 5 days in culture.** Primary CD4+ T cells were infected with the NL4.3 ADA GFP  
239 WT. Forty-eight hours post-infection, the GFP- cell population was sorted by flow  
240 cytometry and kept in culture for 5 days. The vast majority of cells (>96%) remained

241 negative for GFP after 5 days of culture. Error bars indicate means  $\pm$  standard errors of  
242 the means for 3 independent experiments.

243

244 **Fig S8. Characterization of cells infected with the X4-tropic NL4.3 virus by RNA-**  
245 **Flow FISH method.** Quantification of the percentage of cells positive for A32 binding  
246 and *Gag-Pol* mRNA based on CD4 and p24 levels among primary CD4<sup>+</sup> T cells infected  
247 with the X4-tropic NL4.3 WT virus. Error bars indicate means  $\pm$  standard errors of the  
248 means of at least 4 independent experiments.
