# Supplementary material for: Uninfected Bystander Cells Impact the Measurement of HIV-Specific Antibody-Dependent Cellular Cytotoxicity Responses
Source: PubMed Central journal article supplement (PMC5874913; doi:10.1128/mbio.00358-18), 2018-03-20

**A**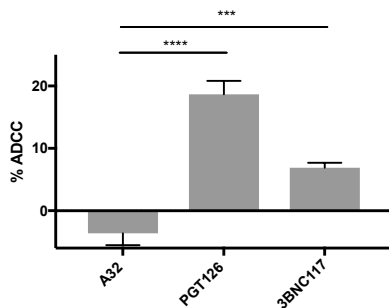**B**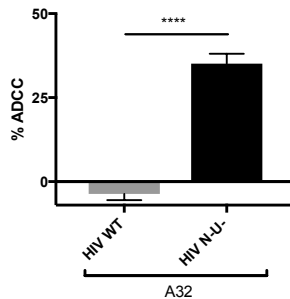**C**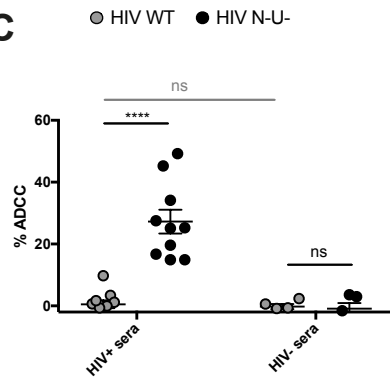**D**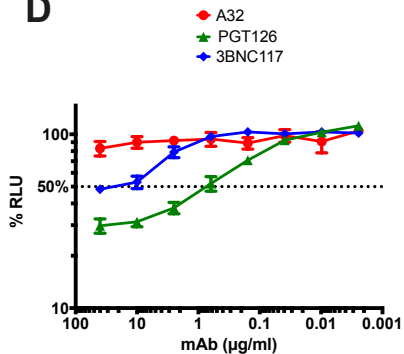**E**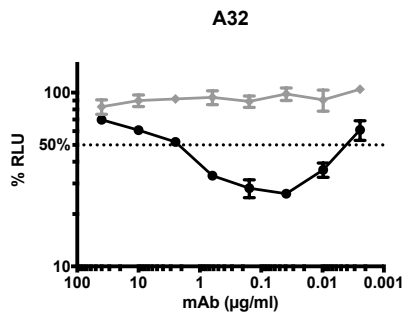**F**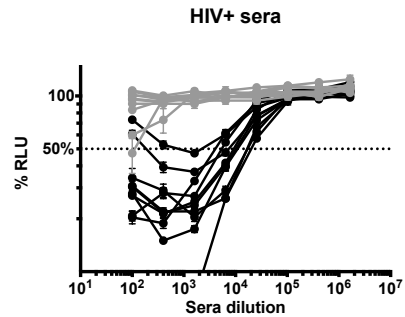

Supplement: mbo002183786sf4.pdf [file mbo002183786sf4.pdf]
